# Supplementary material for: Luminescent homochiral silver(i) lamellar coordination networks built from helical chains
Source: Royal Society of Chemistry journal article supplement (doi:10.1039/b403609c), 2004-01-01
Supplement: b403609c.pdf [file b403609c.pdf]

**Supplemental Information for**  
**Luminescent homochiral silver(I) lamellar coordination networks**  
**built from helical chains**

Chuan-De Wu, Helen L. Ngo, Wenbin Lin\*

*Department of Chemistry, CB#3290, University of North Carolina, Chapel Hill, NC 27599, USA;*  
*Email: wlin@unc.edu*

**Tables**

**Table S1.** Crystal data and structure refinement for AgL<sub>2</sub>X (X = NO<sub>3</sub><sup>-</sup>, **1** and X = ClO<sub>4</sub><sup>-</sup>, **2**)

|                                                  | <b>1</b>                                                             | <b>2</b>                                                                 |
|--------------------------------------------------|----------------------------------------------------------------------|--------------------------------------------------------------------------|
| Formula                                          | C72 H56 Ag N5 O7                                                     | C72 H56 Ag Cl N4 O8                                                      |
| Formula weight                                   | 1211.09                                                              | 1248.53                                                                  |
| Crystal size (mm <sup>3</sup> )                  | 0.80 × 0.60 × 0.20                                                   | 0.70 × 0.50 × 0.20                                                       |
| Crystal color                                    | colorless                                                            | colorless                                                                |
| Crystal system                                   | Monoclinic                                                           | Monoclinic,                                                              |
| Space group                                      | C2                                                                   | C2                                                                       |
| Unit cell dimensions                             | a = 33.739(16) Å<br>b = 9.704(3) Å<br>c = 8.672(2) Å<br>β = 95.92(4) | a = 34.6314(9) Å<br>b = 10.2182(2) Å<br>c = 8.3801(2) Å<br>β = 91.780(2) |
| Volume (Å <sup>3</sup> )                         | 2824.1(17)                                                           | 2964.04(12)                                                              |
| Z                                                | 2                                                                    | 2                                                                        |
| Calculated density (g·cm <sup>-3</sup> )         | 1.424                                                                | 1.399                                                                    |
| F(000)                                           | 1252                                                                 | 1288                                                                     |
| Temperature (K)                                  | 173(2)                                                               | 173(2)                                                                   |
| Wavelength (Å)                                   | 0.71073                                                              | 0.71073                                                                  |
| Absorption coefficient (mm <sup>-1</sup> )       | 0.421                                                                | 0.448                                                                    |
| θ for data collection (°)                        | 3.52 to 25.09                                                        | 3.99 to 23.29                                                            |
| Limiting indices                                 | -40 ≤ h ≤ 37, -11 ≤ k ≤ 11, -10 ≤ l ≤ 10                             | -38 ≤ h ≤ 31, -10 ≤ k ≤ 11, -9 ≤ l ≤ 9                                   |
| Reflections collected                            | 11493                                                                | 7711                                                                     |
| Unique reflections (R(int))                      | 4853 [R(int) = 0.0314]                                               | 4024 [R(int) = 0.0339]                                                   |
| Refinement method                                | Empirical                                                            | Empirical                                                                |
| Absorption correction                            | Full-matrix least-squares on F <sup>2</sup>                          | Full-matrix least-squares on F <sup>2</sup>                              |
| Data / restraints / parameters                   | 4853 / 1 / 385                                                       | 4024 / 4 / 389                                                           |
| Goodness-of-fit on F <sup>2</sup>                | 1.043                                                                | 1.031                                                                    |
| Final R indices [I > 2σ(I)]                      | R1 = 0.0262, wR2 = 0.0596                                            | R1 = 0.0466, wR2 = 0.1068                                                |
| R indices (all data)                             | R1 = 0.0287, wR2 = 0.0608                                            | R1 = 0.0543, wR2 = 0.1117                                                |
| Flack parameter                                  | -0.019(14)                                                           | -0.07(4)                                                                 |
| Largest diff. peak and hole (e·Å <sup>-3</sup> ) | 0.310 and -0.334                                                     | 0.840 and -0.563                                                         |

$$R1 = \sum(|F_o| - |F_c|) / \sum|F_o|, wR2 = [\sum w(F_o^2 - F_c^2)^2 / \sum w(F_o^2)^2]^{0.5}.$$

**Table S2.** Atomic coordinates ( $\times 10^4$ ) and equivalent isotropic displacement parameters ( $\text{\AA}^2 \times 10^3$ ) for **1**.

| Atom  | x       | y        | z        | U(eq) | Atom  | x       | y       | z       | U(eq) |
|-------|---------|----------|----------|-------|-------|---------|---------|---------|-------|
| Ag(1) | 5000    | 8904(1)  | 5000     | 28(1) | C(15) | 8676(1) | 7652(3) | 2742(3) | 25(1) |
| O(1)  | 8447(1) | 5405(2)  | 5961(2)  | 27(1) | C(16) | 8479(1) | 6681(2) | 3642(2) | 22(1) |
| O(2)  | 7723(1) | 7689(2)  | 4271(2)  | 32(1) | C(17) | 8645(1) | 6358(2) | 5123(3) | 22(1) |
| O(3)  | 9861(1) | 8980(3)  | 8813(2)  | 41(1) | C(18) | 8250(1) | 6001(3) | 7187(3) | 37(1) |
| O(4)  | 10000   | 10888(3) | 10000    | 52(1) | C(19) | 7689(1) | 8909(5) | 3343(3) | 44(1) |
| N(1)  | 9761(1) | 4525(2)  | 12599(2) | 25(1) | C(20) | 8096(1) | 6003(2) | 3029(2) | 23(1) |
| N(2)  | 5560(1) | 7450(2)  | 4605(2)  | 28(1) | C(21) | 8105(1) | 4756(3) | 2136(2) | 23(1) |
| N(3)  | 10000   | 9616(3)  | 10000    | 27(1) | C(22) | 8458(1) | 4242(3) | 1599(3) | 28(1) |
| C(1)  | 9649(1) | 3518(2)  | 11590(3) | 27(1) | C(23) | 8456(1) | 3028(3) | 802(3)  | 35(1) |
| C(2)  | 9468(1) | 3754(3)  | 10113(2) | 26(1) | C(24) | 8103(1) | 2262(3) | 498(3)  | 38(1) |
| C(3)  | 9398(1) | 5103(3)  | 9601(3)  | 24(1) | C(25) | 7754(1) | 2748(3) | 955(3)  | 34(1) |
| C(4)  | 9526(1) | 6145(3)  | 10634(3) | 28(1) | C(26) | 7744(1) | 4015(4) | 1775(2) | 27(1) |
| C(5)  | 9703(1) | 5815(3)  | 12091(3) | 26(1) | C(27) | 7386(1) | 4539(3) | 2247(3) | 29(1) |
| C(6)  | 9192(1) | 5367(3)  | 8053(3)  | 26(1) | C(28) | 7373(1) | 5757(3) | 3043(3) | 26(1) |
| C(7)  | 9212(1) | 6556(3)  | 7303(3)  | 26(1) | C(29) | 7737(1) | 6482(2) | 3415(2) | 24(1) |
| C(8)  | 9014(1) | 6928(3)  | 5765(3)  | 24(1) | C(30) | 7000(1) | 6321(3) | 3523(3) | 28(1) |
| C(9)  | 9191(1) | 7896(3)  | 4911(3)  | 27(1) | C(31) | 6654(1) | 5658(3) | 3501(3) | 31(1) |
| C(10) | 9032(1) | 8294(3)  | 3400(3)  | 26(1) | C(32) | 5916(1) | 7891(3) | 5272(3) | 31(1) |
| C(11) | 9218(1) | 9297(2)  | 2543(3)  | 30(1) | C(33) | 6273(1) | 7347(3) | 4960(3) | 31(1) |
| C(12) | 9064(1) | 9643(3)  | 1076(3)  | 36(1) | C(34) | 6280(1) | 6267(3) | 3905(3) | 27(1) |
| C(13) | 8719(1) | 8991(5)  | 412(2)   | 39(1) | C(35) | 5916(1) | 5810(3) | 3234(3) | 27(1) |
| C(14) | 8529(1) | 8019(3)  | 1209(3)  | 31(1) | C(36) | 5567(1) | 6415(3) | 3595(3) | 28(1) |

**Table S3.** Atomic coordinates ( $\times 10^4$ ) and equivalent isotropic displacement parameters ( $\text{\AA}^2 \times 10^3$ ) for **2**.

| Atom  | x       | y        | z          | U(eq)  | Atom  | x       | y        | z          | U(eq)   |
|-------|---------|----------|------------|--------|-------|---------|----------|------------|---------|
| Ag(1) | 0       | 8633(1)  | -10000     | 53(1)  | C(15) | 3062(2) | 4402(6)  | -12711(6)  | 44(2)   |
| Cl(1) | 0       | 14758(3) | -15000     | 81(1)  | C(16) | 3034(2) | 5556(6)  | -11768(6)  | 42(2)   |
| O(1)  | 2646(1) | 7124(4)  | -10464(5)  | 50(1)  | C(17) | 2675(2) | 6009(6)  | -11406(6)  | 44(2)   |
| O(2)  | 3370(1) | 4937(5)  | -8802(5)   | 53(1)  | C(18) | 2590(2) | 8299(6)  | -11368(8)  | 64(2)   |
| O(3)  | 272(2)  | 15586(8) | -15745(10) | 116(3) | C(19) | 3168(2) | 5443(7)  | -7482(8)   | 58(2)   |
| O(4)  | -195(2) | 13961(5) | -16149(8)  | 129(3) | C(20) | 3388(2) | 6234(6)  | -11137(7)  | 42(2)   |
| N(1)  | 553(1)  | 7310(5)  | -10496(6)  | 44(1)  | C(21) | 3568(2) | 7227(7)  | -12042(7)  | 47(2)   |
| N(2)  | 4761(1) | 4489(6)  | -2327(6)   | 46(1)  | C(22) | 3426(2) | 7618(8)  | -13578(7)  | 56(2)   |
| C(1)  | 891(2)  | 7736(7)  | -9898(8)   | 51(2)  | C(23) | 3595(2) | 8617(14) | -14372(8)  | 74(2)   |
| C(2)  | 1238(2) | 7130(7)  | -10174(7)  | 48(2)  | C(24) | 3912(2) | 9284(9)  | -13726(10) | 77(2)   |
| C(4)  | 887(2)  | 5632(8)  | -11827(11) | 65(2)  | C(25) | 4063(2) | 8895(11) | -12281(8)  | 74(3)   |
| C(5)  | 556(2)  | 6292(7)  | -11433(8)  | 53(2)  | C(26) | 3898(2) | 7891(7)  | -11390(8)  | 53(2)   |
| C(3)  | 1246(2) | 6049(7)  | -11138(9)  | 44(2)  | C(27) | 4054(2) | 7435(9)  | -9900(8)   | 65(2)   |
| C(6)  | 1611(2) | 5385(7)  | -11560(7)  | 54(2)  | C(29) | 3550(2) | 5887(7)  | -9674(7)   | 48(2)   |
| C(7)  | 1959(2) | 5903(7)  | -11415(7)  | 48(2)  | C(28) | 3896(2) | 6466(9)  | -8997(9)   | 57(2)   |
| C(8)  | 2329(2) | 5358(6)  | -11878(7)  | 42(2)  | C(30) | 4073(2) | 5918(15) | -7594(11)  | 119(5)  |
| C(9)  | 2359(2) | 4217(6)  | -12733(7)  | 47(2)  | C(31) | 4290(4) | 6190(20) | -6474(13)  | 330(20) |
| C(10) | 2718(2) | 3697(10) | -13187(5)  | 46(1)  | C(32) | 4413(3) | 5401(18) | -5209(11)  | 146(7)  |
| C(11) | 2750(2) | 2542(7)  | -14070(7)  | 53(2)  | C(33) | 4538(4) | 6190(14) | -4033(15)  | 128(6)  |
| C(12) | 3098(2) | 2081(7)  | -14495(8)  | 61(2)  | C(34) | 4713(2) | 5732(8)  | -2663(9)   | 69(2)   |
| C(13) | 3438(2) | 2780(8)  | -14081(8)  | 64(2)  | C(35) | 4459(2) | 4060(13) | -4863(8)   | 93(4)   |
| C(14) | 3425(2) | 3903(8)  | -13219(6)  | 52(2)  | C(36) | 4636(2) | 3647(12) | -3442(6)   | 58(2)   |

**Table S4.** Selected bond lengths [ $\text{\AA}$ ] for **1**.

| Bond         | distances | Bond        | distances | Bond        | distances |
|--------------|-----------|-------------|-----------|-------------|-----------|
| Ag(1)-N(1)#1 | 2.237(2)  | C(3)-C(6)   | 1.470(3)  | C(20)-C(21) | 1.438(3)  |
| Ag(1)-N(1)#2 | 2.237(2)  | C(4)-C(5)   | 1.379(3)  | C(21)-C(22) | 1.415(3)  |
| Ag(1)-N(2)#3 | 2.410(2)  | C(6)-C(7)   | 1.329(4)  | C(21)-C(26) | 1.420(4)  |
| Ag(1)-N(2)   | 2.410(2)  | C(7)-C(8)   | 1.473(3)  | C(22)-C(23) | 1.366(4)  |
| O(1)-C(17)   | 1.387(3)  | C(8)-C(9)   | 1.370(4)  | C(23)-C(24) | 1.406(4)  |
| O(1)-C(18)   | 1.434(3)  | C(8)-C(17)  | 1.424(3)  | C(24)-C(25) | 1.366(4)  |
| O(2)-C(29)   | 1.389(3)  | C(9)-C(10)  | 1.417(3)  | C(25)-C(26) | 1.421(4)  |
| O(2)-C(19)   | 1.429(4)  | C(10)-C(11) | 1.411(3)  | C(26)-C(27) | 1.409(4)  |
| O(3)-N(3)    | 1.250(2)  | C(10)-C(15) | 1.420(4)  | C(27)-C(28) | 1.372(4)  |
| O(4)-N(3)    | 1.235(4)  | C(11)-C(12) | 1.366(4)  | C(28)-C(29) | 1.423(4)  |
| N(1)-C(5)    | 1.334(3)  | C(12)-C(13) | 1.396(4)  | C(28)-C(30) | 1.469(3)  |
| N(1)-C(1)    | 1.339(3)  | C(13)-C(14) | 1.368(4)  | C(30)-C(31) | 1.332(4)  |
| N(2)-C(36)   | 1.334(3)  | C(14)-C(15) | 1.416(3)  | C(31)-C(34) | 1.468(4)  |

|             |          |             |          |             |          |
|-------------|----------|-------------|----------|-------------|----------|
| N(2)-C(32)  | 1.348(3) | C(15)-C(16) | 1.431(3) | C(32)-C(33) | 1.368(4) |
| N(3)-O(3)#5 | 1.250(2) | C(16)-C(17) | 1.383(3) | C(33)-C(34) | 1.393(4) |
| C(1)-C(2)   | 1.379(3) | C(16)-C(20) | 1.498(3) | C(34)-C(35) | 1.379(4) |
| C(2)-C(3)   | 1.395(4) | C(20)-C(29) | 1.372(3) | C(35)-C(36) | 1.380(4) |
| C(3)-C(4)   | 1.389(3) |             |          |             |          |

**Table S5.** Selected angles [°] for **1**

| Atom1-atom2-atom3   | angles     | Atom1-atom2-atom3 | angles     | Atom1-atom2-atom3 | angles   |
|---------------------|------------|-------------------|------------|-------------------|----------|
| N(1)#1-Ag(1)-N(1)#2 | 148.77(11) | C(6)-C(7)-C(8)    | 127.9(2)   | C(22)-C(21)-C(20) | 122.6(2) |
| N(1)#1-Ag(1)-N(2)#3 | 103.79(7)  | C(9)-C(8)-C(17)   | 117.8(2)   | C(26)-C(21)-C(20) | 118.7(2) |
| N(1)#2-Ag(1)-N(2)#3 | 94.40(8)   | C(9)-C(8)-C(7)    | 118.4(2)   | C(23)-C(22)-C(21) | 120.7(2) |
| N(1)#1-Ag(1)-N(2)   | 94.40(8)   | C(17)-C(8)-C(7)   | 123.7(2)   | C(22)-C(23)-C(24) | 120.6(2) |
| N(1)#2-Ag(1)-N(2)   | 103.79(7)  | C(8)-C(9)-C(10)   | 122.9(2)   | C(25)-C(24)-C(23) | 120.2(2) |
| N(2)#3-Ag(1)-N(2)   | 108.32(10) | C(11)-C(10)-C(9)  | 121.9(2)   | C(24)-C(25)-C(26) | 120.6(2) |
| C(17)-O(1)-C(18)    | 113.8(2)   | C(11)-C(10)-C(15) | 119.7(2)   | C(27)-C(26)-C(21) | 119.5(3) |
| C(29)-O(2)-C(19)    | 113.75(18) | C(9)-C(10)-C(15)  | 118.4(2)   | C(27)-C(26)-C(25) | 121.5(2) |
| C(5)-N(1)-C(1)      | 116.58(19) | C(12)-C(11)-C(10) | 120.9(2)   | C(21)-C(26)-C(25) | 119.0(2) |
| C(5)-N(1)-Ag(1)#4   | 125.86(16) | C(11)-C(12)-C(13) | 119.6(3)   | C(28)-C(27)-C(26) | 122.2(3) |
| C(1)-N(1)-Ag(1)#4   | 117.50(15) | C(14)-C(13)-C(12) | 121.3(2)   | C(27)-C(28)-C(29) | 117.8(2) |
| C(36)-N(2)-C(32)    | 116.5(2)   | C(13)-C(14)-C(15) | 120.7(2)   | C(27)-C(28)-C(30) | 122.5(2) |
| C(36)-N(2)-Ag(1)    | 126.93(16) | C(14)-C(15)-C(10) | 117.9(2)   | C(29)-C(28)-C(30) | 119.6(2) |
| C(32)-N(2)-Ag(1)    | 115.42(17) | C(14)-C(15)-C(16) | 122.7(2)   | C(20)-C(29)-O(2)  | 119.6(2) |
| O(4)-N(3)-O(3)      | 119.61(16) | C(10)-C(15)-C(16) | 119.4(2)   | C(20)-C(29)-C(28) | 122.7(2) |
| O(4)-N(3)-O(3)#5    | 119.61(16) | C(17)-C(16)-C(15) | 119.4(2)   | O(2)-C(29)-C(28)  | 117.6(2) |
| O(3)-N(3)-O(3)#5    | 120.8(3)   | C(17)-C(16)-C(20) | 118.8(2)   | C(31)-C(30)-C(28) | 126.2(2) |
| N(1)-C(1)-C(2)      | 123.5(2)   | C(15)-C(16)-C(20) | 121.88(19) | C(30)-C(31)-C(34) | 125.2(2) |
| C(1)-C(2)-C(3)      | 119.7(2)   | C(16)-C(17)-O(1)  | 117.9(2)   | N(2)-C(32)-C(33)  | 123.8(2) |
| C(4)-C(3)-C(2)      | 116.5(2)   | C(16)-C(17)-C(8)  | 121.9(2)   | C(32)-C(33)-C(34) | 119.8(2) |
| C(4)-C(3)-C(6)      | 123.2(2)   | O(1)-C(17)-C(8)   | 120.1(2)   | C(35)-C(34)-C(33) | 116.3(2) |
| C(2)-C(3)-C(6)      | 120.2(2)   | C(29)-C(20)-C(21) | 119.0(2)   | C(35)-C(34)-C(31) | 121.4(2) |
| C(5)-C(4)-C(3)      | 119.8(2)   | C(29)-C(20)-C(16) | 121.1(2)   | C(33)-C(34)-C(31) | 122.3(2) |
| N(1)-C(5)-C(4)      | 123.7(2)   | C(21)-C(20)-C(16) | 119.7(2)   | C(34)-C(35)-C(36) | 120.9(2) |
| C(7)-C(6)-C(3)      | 123.7(2)   | C(22)-C(21)-C(26) | 118.7(2)   | N(2)-C(36)-C(35)  | 122.8(2) |

Symmetry transformations used to generate equivalent atoms: #1:  $-x+3/2, y+1/2, -z+2$ ; #2:  $x-1/2, y+1/2, z-1$ ; #3:

$-x+1, y, -z+1$ ; #4:  $x+1/2, y-1/2, z+1$ ; #5:  $-x+2, y, -z+2$

**Table S6.** Selected bond lengths [ $\text{\AA}$ ] for **2**.

| Bond         | distances | Bond        | distances | Bond        | distances |
|--------------|-----------|-------------|-----------|-------------|-----------|
| Ag(1)-N(2)#1 | 2.270(5)  | C(2)-C(3)   | 1.368(10) | C(33)-C(34) | 1.363(13) |
| Ag(1)-N(2)#2 | 2.270(5)  | C(4)-C(5)   | 1.379(10) | C(35)-C(36) | 1.388(9)  |
| Ag(1)-N(1)#3 | 2.390(5)  | C(4)-C(3)   | 1.421(10) | C(8)-C(17)  | 1.417(9)  |
| Ag(1)-N(1)   | 2.390(5)  | C(3)-C(6)   | 1.488(10) | C(9)-C(10)  | 1.415(9)  |
| Cl(1)-O(4)#4 | 1.417(5)  | C(6)-C(7)   | 1.317(9)  | C(10)-C(11) | 1.400(11) |
| Cl(1)-O(4)   | 1.417(5)  | C(7)-C(8)   | 1.462(9)  | C(10)-C(15) | 1.438(9)  |
| Cl(1)-O(3)   | 1.426(8)  | C(8)-C(9)   | 1.374(8)  | C(11)-C(12) | 1.352(10) |
| Cl(1)-O(3)#4 | 1.426(8)  | C(23)-C(24) | 1.389(12) | C(12)-C(13) | 1.413(11) |
| O(1)-C(17)   | 1.391(7)  | C(24)-C(25) | 1.362(10) | C(13)-C(14) | 1.357(10) |
| O(1)-C(18)   | 1.430(8)  | C(25)-C(26) | 1.401(11) | C(14)-C(15) | 1.435(9)  |
| O(2)-C(29)   | 1.376(8)  | C(26)-C(27) | 1.424(9)  | C(15)-C(16) | 1.424(8)  |
| O(2)-C(19)   | 1.424(8)  | C(27)-C(28) | 1.371(11) | C(16)-C(17) | 1.369(8)  |
| N(1)-C(5)    | 1.304(8)  | C(29)-C(28) | 1.438(11) | C(16)-C(20) | 1.490(8)  |
| N(1)-C(1)    | 1.333(8)  | C(28)-C(30) | 1.425(12) | C(20)-C(29) | 1.379(8)  |
| N(2)-C(34)   | 1.311(9)  | C(30)-C(31) | 1.217(16) | C(20)-C(21) | 1.421(9)  |
| N(2)-C(36)   | 1.333(10) | C(31)-C(32) | 1.390(14) | C(21)-C(22) | 1.421(8)  |
| N(2)-Ag(1)#5 | 2.270(5)  | C(32)-C(33) | 1.34(2)   | C(21)-C(26) | 1.425(9)  |
| C(1)-C(2)    | 1.376(9)  | C(32)-C(35) | 1.409(18) | C(22)-C(23) | 1.361(13) |

**Table S7.** Selected angles [°] for **2**

| Atom1-atom2-atom3   | angles     | Atom1-atom2-atom3 | angles   | Atom1-atom2-atom3 | angles    |
|---------------------|------------|-------------------|----------|-------------------|-----------|
| N(2)#1-Ag(1)-N(2)#2 | 134.6(3)   | C(6)-C(7)-C(8)    | 129.0(7) | C(4)-C(3)-C(6)    | 120.4(7)  |
| N(2)#1-Ag(1)-N(1)#3 | 109.96(17) | C(9)-C(8)-C(17)   | 117.9(6) | C(7)-C(6)-C(3)    | 125.2(7)  |
| N(2)#2-Ag(1)-N(1)#3 | 95.43(18)  | C(9)-C(8)-C(7)    | 122.8(6) | C(20)-C(21)-C(26) | 119.7(5)  |
| N(2)#1-Ag(1)-N(1)   | 95.43(18)  | C(17)-C(8)-C(7)   | 119.3(6) | C(23)-C(22)-C(21) | 120.8(7)  |
| N(2)#2-Ag(1)-N(1)   | 109.96(17) | C(8)-C(9)-C(10)   | 122.6(6) | C(22)-C(23)-C(24) | 121.6(6)  |
| N(1)#3-Ag(1)-N(1)   | 111.2(3)   | C(11)-C(10)-C(9)  | 122.9(6) | C(25)-C(24)-C(23) | 118.7(8)  |
| O(4)#4-Cl(1)-O(4)   | 109.8(5)   | C(11)-C(10)-C(15) | 119.4(6) | C(24)-C(25)-C(26) | 122.4(7)  |
| O(4)#4-Cl(1)-O(3)   | 109.3(4)   | C(9)-C(10)-C(15)  | 117.7(7) | C(25)-C(26)-C(27) | 123.9(7)  |
| O(4)-Cl(1)-O(3)     | 110.6(5)   | C(12)-C(11)-C(10) | 121.2(7) | C(25)-C(26)-C(21) | 118.7(6)  |
| O(4)#4-Cl(1)-O(3)#4 | 110.6(5)   | C(11)-C(12)-C(13) | 120.2(6) | C(27)-C(26)-C(21) | 117.3(7)  |
| O(4)-Cl(1)-O(3)#4   | 109.3(4)   | C(14)-C(13)-C(12) | 121.1(7) | C(28)-C(27)-C(26) | 124.9(7)  |
| O(3)-Cl(1)-O(3)#4   | 107.2(7)   | C(13)-C(14)-C(15) | 120.1(7) | O(2)-C(29)-C(20)  | 118.4(6)  |
| C(17)-O(1)-C(18)    | 113.4(4)   | C(16)-C(15)-C(14) | 122.2(6) | O(2)-C(29)-C(28)  | 117.8(6)  |
| C(29)-O(2)-C(19)    | 113.4(5)   | C(16)-C(15)-C(10) | 120.0(6) | C(20)-C(29)-C(28) | 123.8(7)  |
| C(5)-N(1)-C(1)      | 117.6(6)   | C(14)-C(15)-C(10) | 117.8(6) | C(27)-C(28)-C(30) | 124.7(9)  |
| C(5)-N(1)-Ag(1)     | 125.2(4)   | C(17)-C(16)-C(15) | 118.7(6) | C(27)-C(28)-C(29) | 115.0(6)  |
| C(1)-N(1)-Ag(1)     | 116.7(4)   | C(17)-C(16)-C(20) | 120.4(5) | C(30)-C(28)-C(29) | 119.8(9)  |
| C(34)-N(2)-C(36)    | 116.0(7)   | C(15)-C(16)-C(20) | 120.9(5) | C(31)-C(30)-C(28) | 141.8(18) |
| C(34)-N(2)-Ag(1)#5  | 126.8(5)   | C(16)-C(17)-O(1)  | 119.0(5) | C(30)-C(31)-C(32) | 128(2)    |
| C(36)-N(2)-Ag(1)#5  | 117.1(5)   | C(16)-C(17)-C(8)  | 123.0(6) | C(33)-C(32)-C(31) | 107.2(16) |
| N(1)-C(1)-C(2)      | 123.4(6)   | O(1)-C(17)-C(8)   | 117.9(5) | C(33)-C(32)-C(35) | 113.8(7)  |
| C(3)-C(2)-C(1)      | 119.8(6)   | C(29)-C(20)-C(21) | 119.0(6) | C(31)-C(32)-C(35) | 139.0(17) |
| C(5)-C(4)-C(3)      | 118.7(7)   | C(29)-C(20)-C(16) | 120.2(6) | C(32)-C(33)-C(34) | 122.7(11) |
| N(1)-C(5)-C(4)      | 123.8(6)   | C(21)-C(20)-C(16) | 120.8(5) | N(2)-C(34)-C(33)  | 124.3(10) |
| C(2)-C(3)-C(4)      | 116.6(7)   | C(22)-C(21)-C(20) | 122.6(6) | C(36)-C(35)-C(32) | 121.1(10) |
| C(2)-C(3)-C(6)      | 122.9(6)   | C(22)-C(21)-C(26) | 117.6(7) | N(2)-C(36)-C(35)  | 122.0(10) |

Symmetry transformations used to generate equivalent atoms: #1: -x+1/2, y+1/2, -z-1; #2: x-1/2, y+1/2, z-1; #3: -x, y, -z-2; #4: -x, y, -z-3; #5: x+1/2, y-1/2, z+1

**Table S8.** Anisotropic displacement parameters ( $\text{\AA}^2 \times 10^3$ ) for **1**.

|       | U11   | U22   | U33   | U23    | U13   | U12   |
|-------|-------|-------|-------|--------|-------|-------|
| Ag(1) | 22(1) | 42(1) | 19(1) | 0      | -3(1) | 0     |
| O(1)  | 30(1) | 27(1) | 23(1) | 2(1)   | -3(1) | -5(1) |
| O(2)  | 31(1) | 35(1) | 28(1) | -10(1) | 0(1)  | 5(1)  |
| O(3)  | 49(1) | 34(1) | 38(1) | -6(1)  | -9(1) | -5(1) |
| O(4)  | 75(2) | 18(1) | 60(2) | 0      | -8(2) | 0     |
| N(1)  | 24(1) | 31(1) | 20(1) | 2(1)   | 2(1)  | 6(1)  |
| N(2)  | 22(1) | 32(1) | 29(1) | -1(1)  | 2(1)  | 1(1)  |

|       |       |       |       |        |       |       |
|-------|-------|-------|-------|--------|-------|-------|
| N(3)  | 22(2) | 22(2) | 37(2) | 0      | 0(1)  | 0     |
| C(1)  | 33(1) | 24(1) | 24(1) | 1(1)   | 0(1)  | 3(1)  |
| C(2)  | 30(1) | 24(1) | 23(1) | -2(1)  | 1(1)  | 1(1)  |
| C(3)  | 19(1) | 31(1) | 21(1) | 0(1)   | 0(1)  | 2(1)  |
| C(4)  | 33(2) | 24(1) | 26(1) | 3(1)   | -3(1) | 2(1)  |
| C(5)  | 27(1) | 28(1) | 22(1) | -4(1)  | -2(1) | 0(1)  |
| C(6)  | 24(1) | 29(1) | 24(1) | -4(1)  | -5(1) | 0(1)  |
| C(7)  | 24(1) | 31(2) | 22(1) | -2(1)  | -6(1) | -3(1) |
| C(8)  | 25(1) | 24(1) | 21(1) | -2(1)  | -3(1) | 1(1)  |
| C(9)  | 24(1) | 28(1) | 26(1) | -4(1)  | -4(1) | -2(1) |
| C(10) | 23(1) | 28(1) | 27(1) | -1(1)  | 3(1)  | 4(1)  |
| C(11) | 28(1) | 29(2) | 33(1) | 1(1)   | 1(1)  | -1(1) |
| C(12) | 38(2) | 34(2) | 36(1) | 11(1)  | 9(1)  | 1(1)  |
| C(13) | 38(1) | 52(2) | 26(1) | 15(2)  | 0(1)  | 10(2) |
| C(14) | 25(1) | 45(2) | 23(1) | 3(1)   | -2(1) | 3(1)  |
| C(15) | 23(1) | 28(1) | 24(1) | -1(1)  | 3(1)  | 7(1)  |
| C(16) | 18(1) | 26(1) | 21(1) | -4(1)  | -1(1) | 4(1)  |
| C(17) | 25(1) | 19(1) | 23(1) | -1(1)  | 1(1)  | 2(1)  |
| C(18) | 29(2) | 51(2) | 31(1) | 3(1)   | 4(1)  | -4(1) |
| C(19) | 52(2) | 34(1) | 45(1) | -9(2)  | 1(1)  | 12(2) |
| C(20) | 22(1) | 29(1) | 17(1) | 0(1)   | -1(1) | 3(1)  |
| C(21) | 22(1) | 29(1) | 18(1) | 2(1)   | -1(1) | 4(1)  |
| C(22) | 22(1) | 38(2) | 24(1) | -1(1)  | -2(1) | 3(1)  |
| C(23) | 26(2) | 45(2) | 34(1) | -9(1)  | 3(1)  | 8(1)  |
| C(24) | 38(2) | 38(2) | 36(1) | -15(1) | -1(1) | 8(1)  |
| C(25) | 27(1) | 36(2) | 37(1) | -11(1) | -2(1) | -1(1) |
| C(26) | 26(1) | 32(1) | 23(1) | -1(1)  | -1(1) | 1(2)  |
| C(27) | 20(1) | 33(1) | 31(1) | -2(1)  | -1(1) | -1(1) |
| C(28) | 25(1) | 32(1) | 22(1) | 2(1)   | 2(1)  | 5(1)  |
| C(29) | 26(1) | 26(1) | 20(1) | -4(1)  | -2(1) | 4(1)  |
| C(30) | 21(1) | 33(1) | 30(1) | -3(1)  | 3(1)  | 4(1)  |
| C(31) | 29(2) | 36(2) | 28(1) | -8(1)  | 0(1)  | 4(1)  |
| C(32) | 26(1) | 34(1) | 32(1) | -8(1)  | 2(1)  | -2(1) |
| C(33) | 20(1) | 41(2) | 31(1) | -5(1)  | 1(1)  | -3(1) |
| C(34) | 25(1) | 35(1) | 20(1) | -1(1)  | 3(1)  | -1(1) |
| C(35) | 27(2) | 31(2) | 24(1) | -4(1)  | 3(1)  | -3(1) |
| C(36) | 23(1) | 32(1) | 26(1) | -3(1)  | -1(1) | -4(1) |

**Table S9.** Anisotropic displacement parameters ( $\text{\AA}^2 \times 10^3$ ) for **2**.

| U11 | U22 | U33 | U23 | U13 | U12 |
|-----|-----|-----|-----|-----|-----|
|-----|-----|-----|-----|-----|-----|

|       |         |         |        |         |         |         |
|-------|---------|---------|--------|---------|---------|---------|
| Ag(1) | 36(1)   | 86(1)   | 37(1)  | 0       | -14(1)  | 0       |
| Cl(1) | 95(2)   | 44(2)   | 100(2) | 0       | -46(2)  | 0       |
| O(1)  | 48(3)   | 60(3)   | 41(2)  | -13(2)  | -10(2)  | 19(2)   |
| O(2)  | 60(3)   | 63(3)   | 36(2)  | 1(2)    | -8(2)   | 17(2)   |
| O(3)  | 88(5)   | 109(6)  | 149(7) | 20(5)   | -13(5)  | -3(4)   |
| O(4)  | 206(7)  | 56(4)   | 117(4) | 4(3)    | -105(5) | -11(4)  |
| N(1)  | 36(3)   | 55(3)   | 40(3)  | -3(3)   | -4(2)   | -2(2)   |
| N(2)  | 41(3)   | 58(4)   | 38(3)  | 3(3)    | -8(2)   | 11(3)   |
| C(1)  | 37(4)   | 66(4)   | 50(4)  | -15(3)  | -1(3)   | -6(3)   |
| C(2)  | 36(4)   | 63(5)   | 44(4)  | -3(3)   | -3(3)   | -9(3)   |
| C(4)  | 51(5)   | 63(5)   | 81(6)  | -27(4)  | 2(4)    | -10(4)  |
| C(5)  | 41(4)   | 65(5)   | 52(4)  | -15(3)  | -9(3)   | -4(3)   |
| C(3)  | 42(4)   | 49(4)   | 40(4)  | -8(3)   | -7(3)   | 2(3)    |
| C(6)  | 52(4)   | 65(5)   | 45(4)  | -13(3)  | -4(3)   | 4(4)    |
| C(7)  | 45(4)   | 57(4)   | 43(3)  | -4(3)   | -2(3)   | 15(3)   |
| C(8)  | 44(4)   | 51(4)   | 31(3)  | -1(3)   | -6(3)   | 7(3)    |
| C(9)  | 47(4)   | 59(4)   | 35(3)  | 2(3)    | -2(3)   | 4(3)    |
| C(10) | 51(3)   | 58(4)   | 28(2)  | -3(4)   | -7(2)   | 7(5)    |
| C(11) | 62(4)   | 55(4)   | 41(4)  | -7(3)   | -3(3)   | 13(4)   |
| C(12) | 79(6)   | 56(5)   | 48(4)  | -22(3)  | -7(4)   | 17(4)   |
| C(13) | 67(5)   | 84(6)   | 41(4)  | -9(4)   | 4(4)    | 35(4)   |
| C(14) | 51(4)   | 75(6)   | 29(3)  | -10(3)  | -1(2)   | 17(4)   |
| C(15) | 50(4)   | 53(4)   | 28(3)  | -2(3)   | -7(3)   | 19(3)   |
| C(16) | 44(4)   | 52(4)   | 28(3)  | 2(3)    | -4(3)   | 17(3)   |
| C(17) | 47(4)   | 55(4)   | 29(3)  | -5(3)   | -5(3)   | 15(3)   |
| C(18) | 85(5)   | 50(6)   | 54(4)  | -14(3)  | -13(3)  | 19(4)   |
| C(19) | 54(4)   | 70(5)   | 49(4)  | -8(4)   | -3(3)   | 5(4)    |
| C(20) | 38(3)   | 55(4)   | 32(3)  | -9(3)   | -9(3)   | 21(3)   |
| C(21) | 40(4)   | 65(4)   | 35(3)  | -11(3)  | -12(3)  | 14(3)   |
| C(22) | 48(4)   | 80(5)   | 39(4)  | 10(4)   | -11(3)  | 7(4)    |
| C(23) | 62(4)   | 102(6)  | 59(4)  | 26(6)   | -12(3)  | 15(7)   |
| C(24) | 62(5)   | 96(6)   | 74(5)  | 8(4)    | 1(4)    | -5(4)   |
| C(25) | 49(4)   | 112(9)  | 60(4)  | -12(5)  | -9(3)   | -10(5)  |
| C(26) | 42(4)   | 69(5)   | 48(4)  | -6(3)   | -2(3)   | 12(3)   |
| C(27) | 36(4)   | 122(7)  | 38(4)  | -17(4)  | -11(3)  | 12(4)   |
| C(29) | 43(4)   | 68(5)   | 34(3)  | -7(3)   | -3(3)   | 22(4)   |
| C(28) | 46(5)   | 91(6)   | 35(4)  | 0(4)    | -15(4)  | 20(4)   |
| C(30) | 36(5)   | 255(15) | 65(6)  | -78(9)  | -7(4)   | 28(7)   |
| C(31) | 200(17) | 700(50) | 84(9)  | 126(18) | 75(10)  | 320(30) |
| C(32) | 95(8)   | 299(19) | 45(5)  | 75(9)   | 32(5)   | 141(11) |
| C(33) | 146(12) | 154(12) | 89(8)  | 85(9)   | 56(8)   | 101(10) |
| C(34) | 64(5)   | 73(6)   | 70(5)  | 20(4)   | 22(4)   | 15(4)   |
| C(35) | 39(4)   | 207(14) | 32(3)  | -16(5)  | -8(3)   | 33(6)   |
| C(36) | 45(3)   | 84(4)   | 44(3)  | 1(6)    | -4(3)   | 2(6)    |



---

**Figures:**

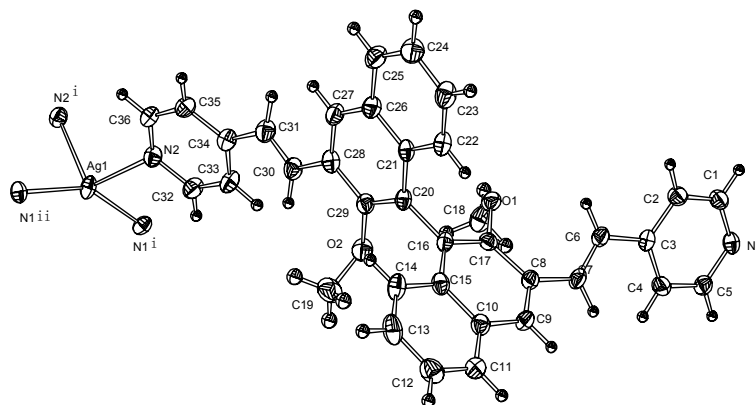

**Fig. S1.** ORTEP representation of the symmetry expanded local structure for **1** (30% probability ellipsoids).

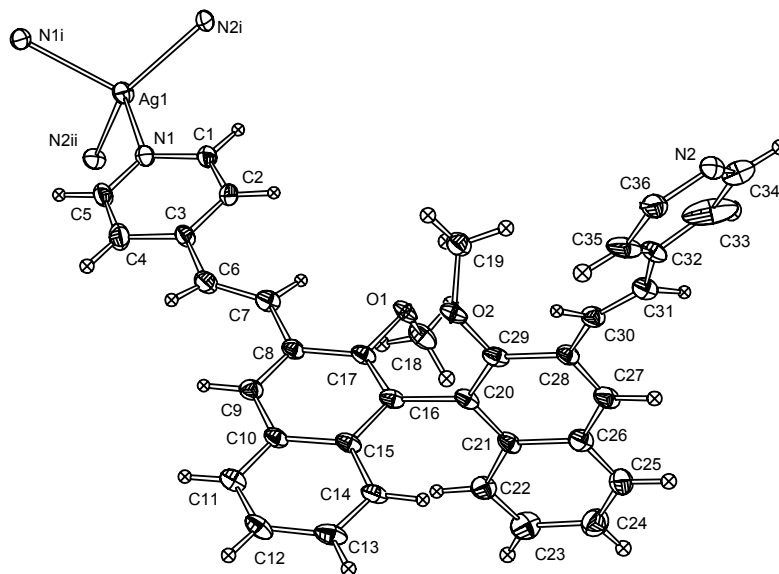

**Fig. S2.** ORTEP representation of the symmetry expanded local structure for **2** (25% probability ellipsoids).

ellipsoids).

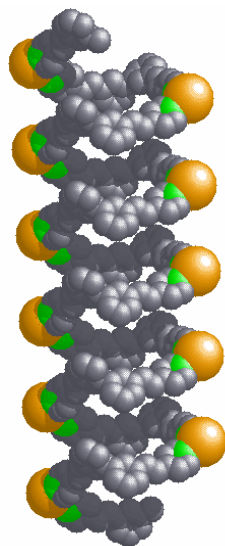

**Fig. S3.** Space filling representation a right-handed helix in **1**.

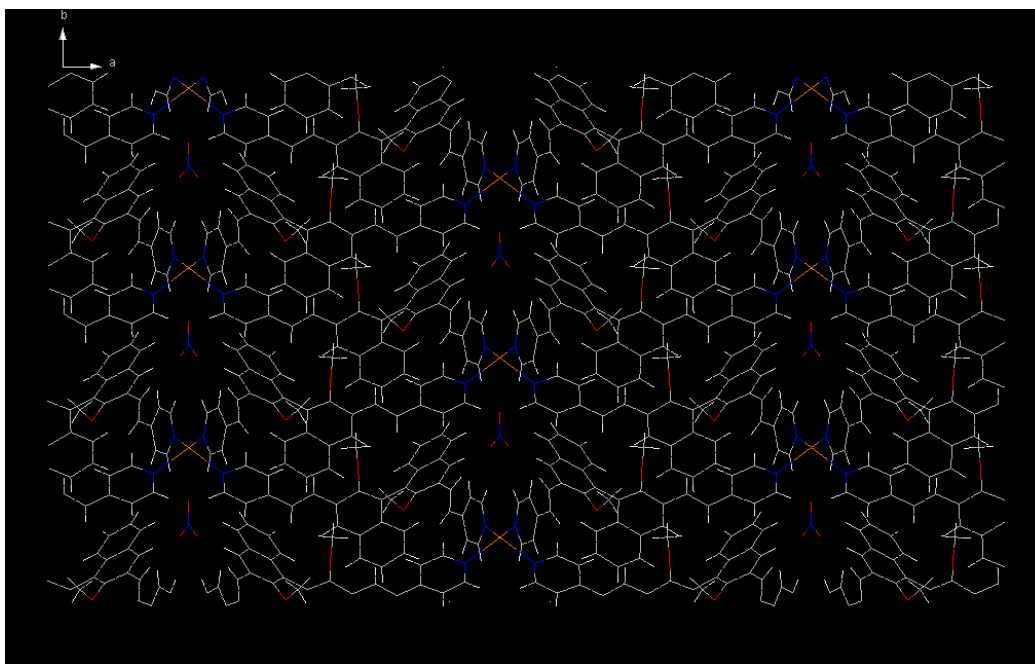

**Fig. S4.** Packing diagram of **1** viewed down the c-axis.

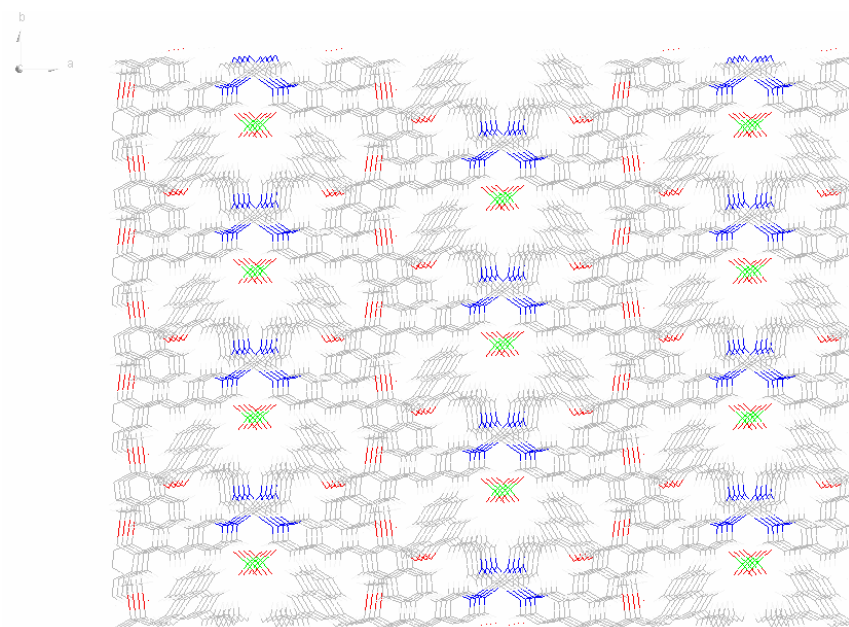

**Fig. S5.** Packing diagram of **2** viewed down the c-axis.

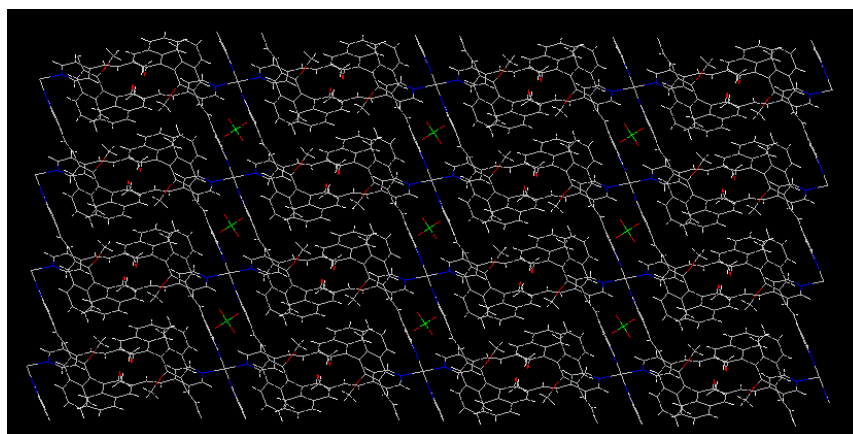

**Fig. S6.** Packing diagram of **2** viewed down the b-axis.

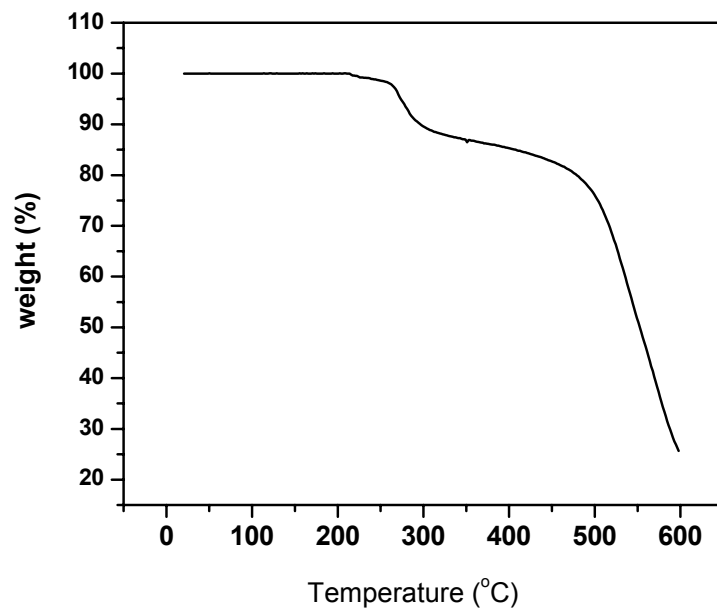

Figure S7. TGA curve for **1** between 20 and 600°C

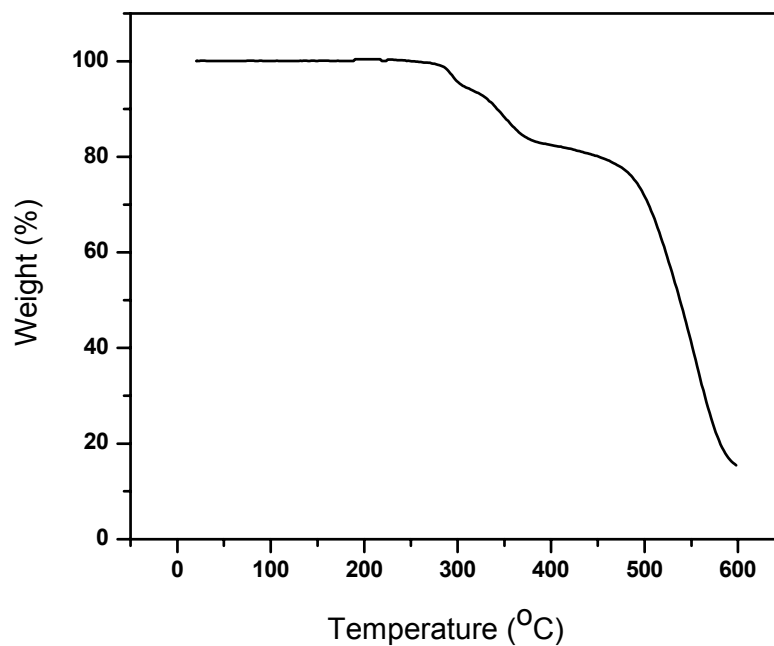

Figure S8. TGA curve for **2** between 20 and 600°C

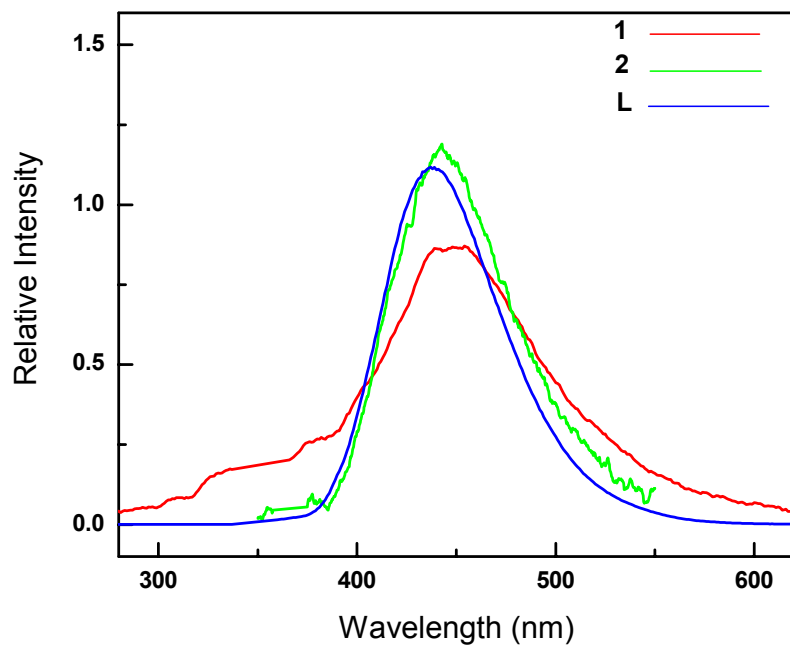

**Figure S9.** The solid state PL spectra of **1** and **2** and solution PL spectrum of **L**.

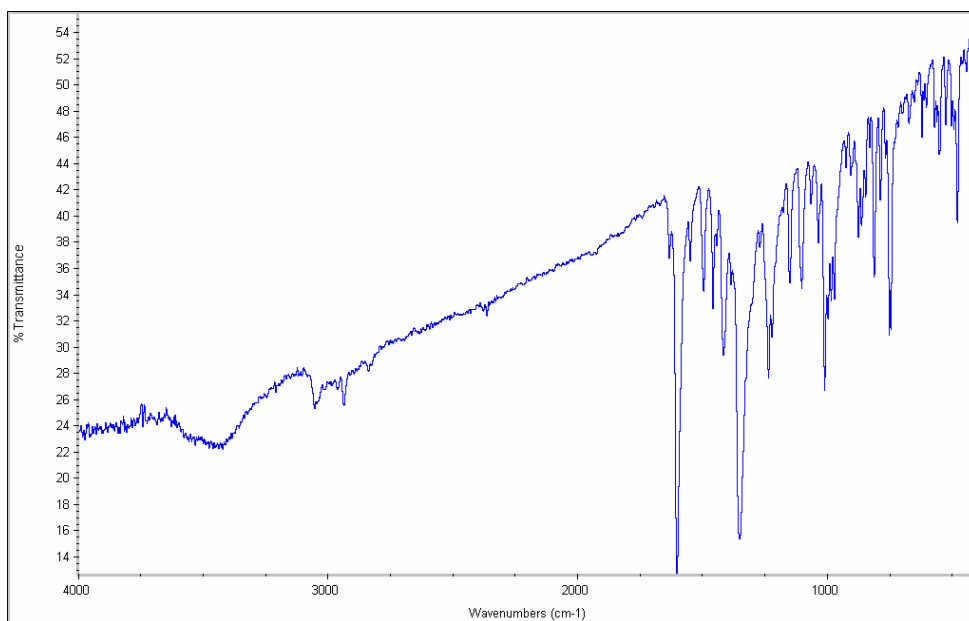

**Figure S10.** IR spectrum of **1**.

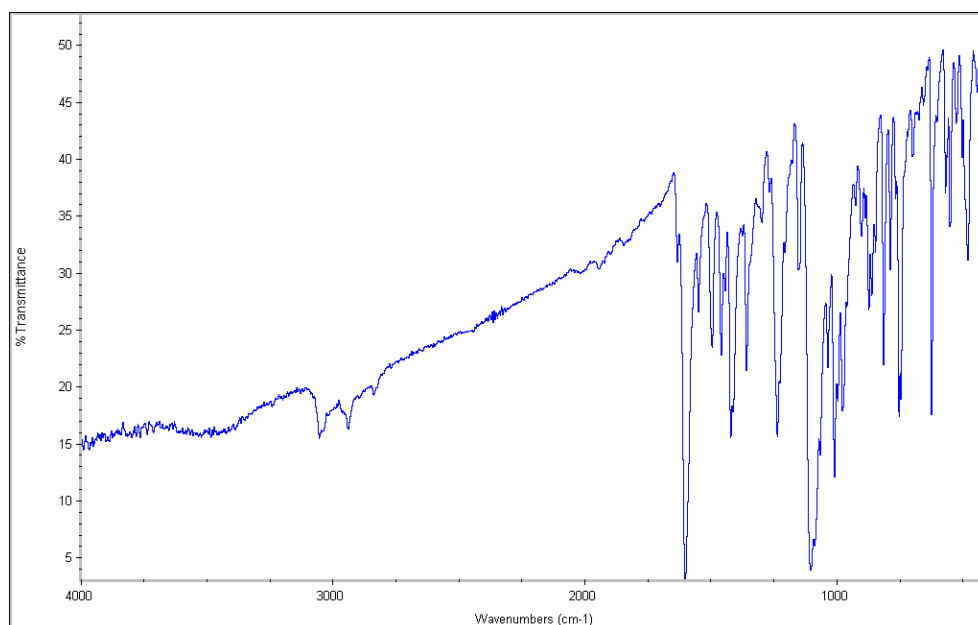

**Figure S11.** IR spectrum of **2**.

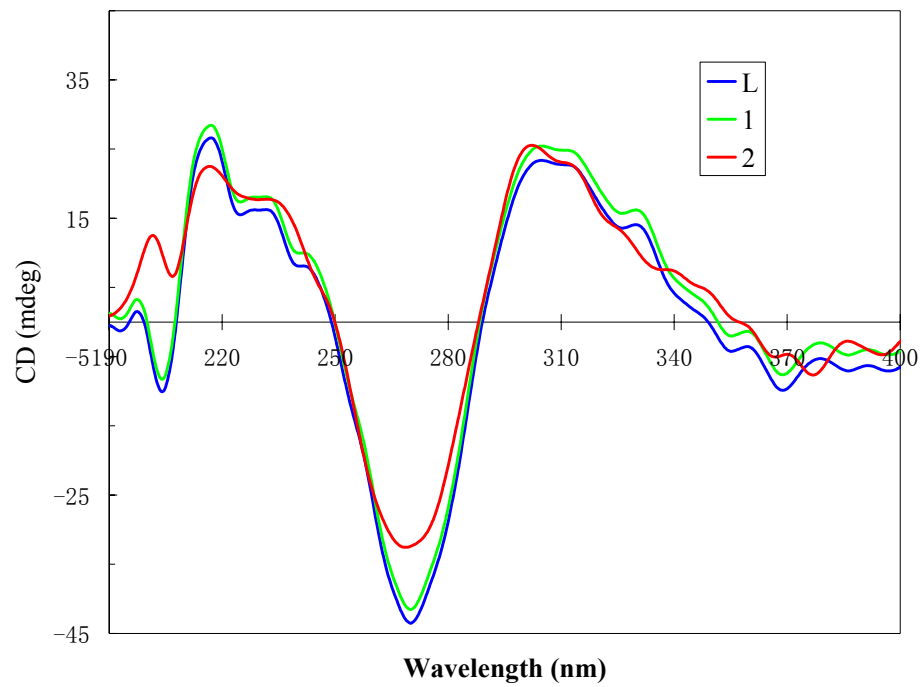

Figure S12. CD spectra of (S)-L, (S)-1, and (S)-2.
